# Supplementary material for: Asymmetric boron-complexes containing keto-isoindolinyl and pyridyl groups: solvatochromic fluorescence, efficient solid-state emission and DFT calculations
Source: Royal Society of Chemistry journal article supplement (doi:10.1039/c5tc03084f), 2015-01-01

# Asymmetric boron-complexes containing keto-isoindolinyl and pyridyl groups: solvatochromic fluorescence, efficient solid-state emission and DFT calculation

Yanping Wu,<sup>a</sup> Hua Lu,<sup>a\*</sup> Sisi Wang,<sup>a</sup> Yuan Deng,<sup>a</sup> Zhen Shen<sup>b\*</sup>

|                                                                                                                 |      |
|-----------------------------------------------------------------------------------------------------------------|------|
| <b>I. Materials and instrumentations</b> .....                                                                  | S2   |
| <b>II. Supplementary Figure</b>                                                                                 |      |
| Fig. S1. Absorption and emission spectra of <b>1a</b> in various solvents .....                                 | S2   |
| Fig. S2. Absorption and emission spectra of <b>1b</b> in various solvents .....                                 | S2   |
| Fig. S3. Absorption and emission spectra of <b>2a</b> in various solvents .....                                 | S3   |
| Fig. S4. Absorption and emission spectra of <b>2b</b> in various solvents .....                                 | S3   |
| Table S1. Spectroscopic properties of <b>1a</b> , <b>1b</b> , <b>2a</b> and <b>2b</b> in various solvents ..... | S4   |
| Table S2. Calculated $E$ , $f$ , and eigenvectors in various solvents .....                                     | S5   |
| Table S3. Calculated $E$ , $f$ , and eigenvectors by B3LYP and CAM-B3LYP functionals .....                      | S6   |
| Fig. S5. Observed and calculated TD-DFT spectra .....                                                           | S7   |
| <b>III. <sup>1</sup>H NMR</b> .....                                                                             | S8-9 |

## I Materials and instrumentations

All reagents were obtained from commercial suppliers and used without further purification unless otherwise indicated. All air and moisture-sensitive reactions were carried out under nitrogen atmosphere in oven-dried glassware. Glassware was dried in an oven at 120 °C and cooled under a stream of inert gas before use. Both dichloromethane and triethylamine were distilled over calcium hydride.  $^1\text{H}$  NMR spectra were recorded on a Bruker DRX400 spectrometer and referenced to the residual proton signals of the solvent. HR-MS were recorded on a Bruker Daltonics microTOF-Q II spectrometer. All the solvents employed for the spectroscopic measurements were of UV spectroscopic grade (Aldrich).

## II. Supplementary Figure

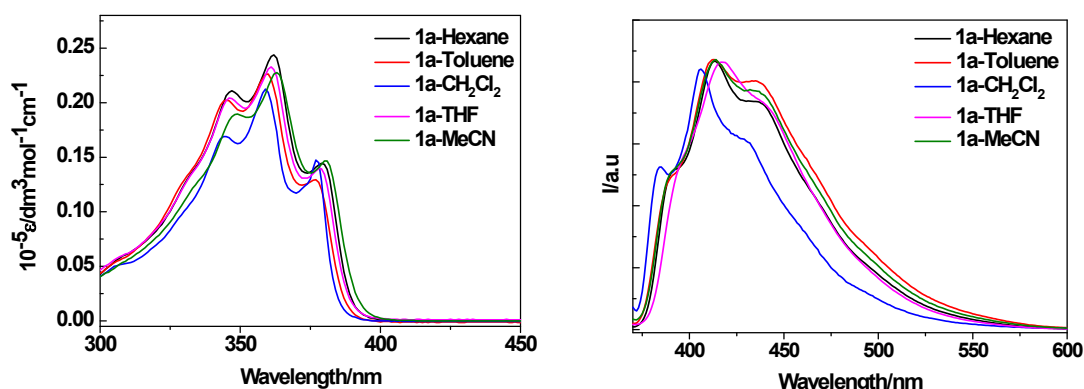

Fig. S1. Absorption and emission spectra of **1a** in a range of different solvents.  $\lambda_{\text{ex}} = 330$  nm.

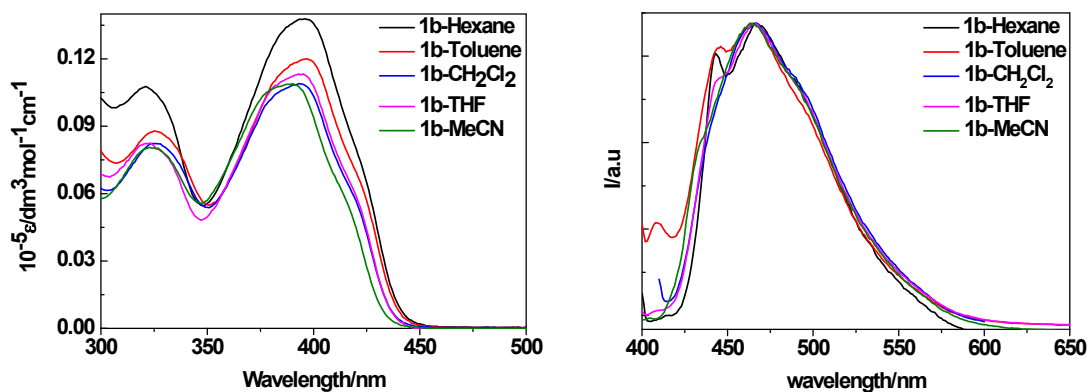

Fig. S2. Absorption and emission spectra of **1b** in a range of different solvents.  $\lambda_{\text{ex}} = 360$  nm.

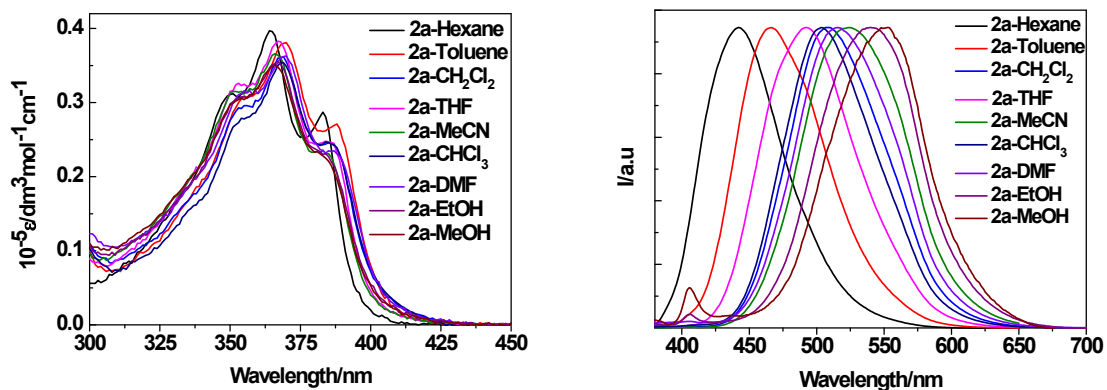

Fig. S3. Absorption and emission spectra of **2a** in a range of different solvents.  $\lambda_{\text{ex}} = 360$  nm.

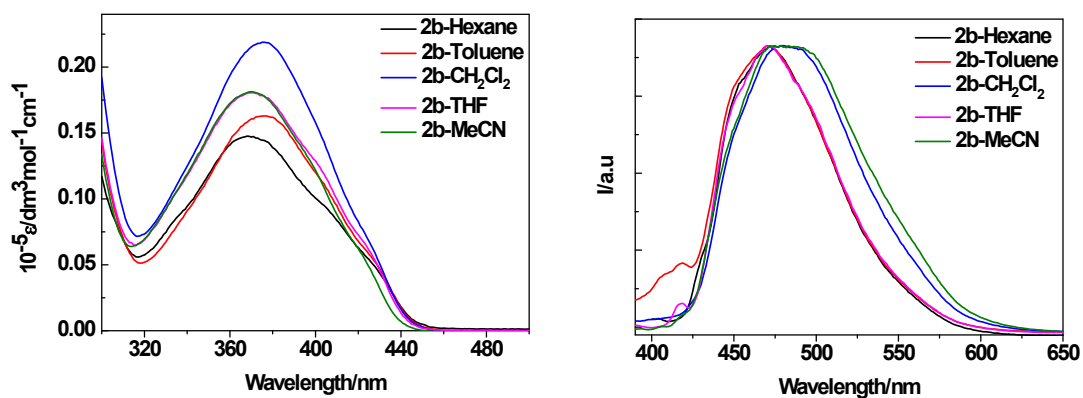

Fig. S4. Absorption and emission spectra of **2b** in a range of different solvents.  $\lambda_{\text{ex}} = 360$  nm.

**Table S1.** Spectroscopic properties of **1a**, **1b**, **2a** and **2b** in various solvents at 298 K

|           | Solvent                  | $\lambda_{\text{abs}}$ [a]<br>[nm] | $\epsilon_{\text{abs}}$ [b]<br>$\text{M}^{-1} \text{cm}^{-1}$ | $\lambda_{\text{em}}$<br>[nm] | $\Delta\nu_{\text{em-}}^{\text{abs}}$ [c]<br>[ $\text{cm}^{-1}$ ] | $\Phi_{\text{f}}$ | $\tau_{\text{f}}$<br>[ns] | $k_{\text{r}}$<br>[ $10^8\text{s}^{-1}$ ] | $k_{\text{nr}}$<br>[ $10^8\text{s}^{-1}$ ] |
|-----------|--------------------------|------------------------------------|---------------------------------------------------------------|-------------------------------|-------------------------------------------------------------------|-------------------|---------------------------|-------------------------------------------|--------------------------------------------|
| <b>1a</b> | hexane                   | 359                                | 21300                                                         | 406                           | 3224                                                              | 0.05              | <0.20                     | nd                                        | nd                                         |
|           | Toluene                  | 363                                | 22800                                                         | 417                           | 3567                                                              | 0.32              | 0.90                      | 3.55                                      | 7.55                                       |
|           | $\text{CH}_2\text{Cl}_2$ | 361                                | 24400                                                         | 413                           | 3488                                                              | 0.33              | 1.01                      | 3.27                                      | 6.63                                       |
|           | THF                      | 361                                | 23300                                                         | 414                           | 3546                                                              | 0.18              | 0.64                      | 2.81                                      | 12.8                                       |
|           | $\text{CH}_3\text{CN}$   | 360                                | 22600                                                         | 413                           | 3565                                                              | 0.15              | 0.58                      | 2.59                                      | 14.65                                      |
| <b>1b</b> | Hexane                   | 396                                | 12800                                                         | 467                           | 3839                                                              | 0.002             | 0.13                      | 0.15                                      | 76.77                                      |
|           | Toluene                  | 397                                | 12000                                                         | 465                           | 3684                                                              | 0.01              | 0.25                      | 0.40                                      | 39.60                                      |
|           | $\text{CH}_2\text{Cl}_2$ | 393                                | 10900                                                         | 466                           | 3986                                                              | 0.005             | 0.20                      | 0.25                                      | 49.75                                      |
|           | THF                      | 395                                | 11300                                                         | 464                           | 3765                                                              | 0.007             | 0.20                      | 0.35                                      | 49.65                                      |
|           | MeCN                     | 388                                | 10800                                                         | 463                           | 4175                                                              | 0.004             | 0.11                      | 0.36                                      | 90.55                                      |
| <b>2a</b> | Hexane                   | 365,383(sh)                        | 39600                                                         | 442                           | 3485                                                              | 0.16              | 2.13                      | 0.75                                      | 3.94                                       |
|           | Toluene                  | 370,388(sh)                        | 38100                                                         | 466                           | 4314                                                              | 0.32              | 5.54                      | 0.58                                      | 1.23                                       |
|           | $\text{CH}_2\text{Cl}_2$ | 368,386(sh)                        | 36000                                                         | 509                           | 6260                                                              | 0.30              | 17.0                      | 0.17                                      | 0.41                                       |
|           | THF                      | 367,385(sh)                        | 38300                                                         | 492                           | 5949                                                              | 0.40              | 11.31                     | 0.35                                      | 0.53                                       |
|           | $\text{CHCl}_3$          | 368,385(sh)                        | 35400                                                         | 504                           | 6133                                                              | 0.30              | 15.04                     | 0.20                                      | 0.47                                       |
|           | MeCN                     | 366,383(sh)                        | 36600                                                         | 524                           | 7026                                                              | 0.17              | 15.97                     | 0.11                                      | 0.52                                       |
|           | DMF                      | 369,386(sh)                        | 36400                                                         | 516                           | 6527                                                              | 0.19              | 15.05                     | 0.13                                      | 0.54                                       |
|           | EtOH                     | 367,384(sh)                        | 35500                                                         | 538                           | 7454                                                              | 0.03              | 5.30                      | 0.06                                      | 1.83                                       |
|           | MeOH                     | 366,383(sh)                        | 35000                                                         | 549                           | 7895                                                              | 0.01              | 2.43                      | 0.04                                      | 4.07                                       |
| <b>2b</b> | Hexane                   | 368                                | 14700                                                         | 472                           | 5987                                                              | 0.007             | 0.31                      | 0.23                                      | 32.03                                      |
|           | Toluene                  | 377                                | 16400                                                         | 470                           | 5249                                                              | 0.02              | 0.57                      | 0.35                                      | 17.19                                      |
|           | $\text{CH}_2\text{Cl}_2$ | 376                                | 21900                                                         | 480                           | 5762                                                              | 0.015             | 0.80                      | 0.19                                      | 12.31                                      |
|           | THF                      | 371                                | 18100                                                         | 470                           | 5678                                                              | 0.013             | 0.41                      | 0.32                                      | 24.07                                      |
|           | MeCN                     | 370                                | 18100                                                         | 474                           | 5930                                                              | 0.013             | 0.79                      | 0.16                                      | 12.49                                      |

[a] sh = shoulder. [b] The molar absorption coefficient was measured in solution containing 1%  $\text{CH}_2\text{Cl}_2$  as a co-solvent. [c] DFT calculation predict that the shoulder around 385 nm in the absorption spectra of **2a** can be assigned to the  $S_0-S_1$  transition, therefore, Stokes shifts are calculated using these values. In case of **1a**, **1b** and **2b**,  $\lambda_{\text{abs}}$  values are the most intense absorption wavelength.

**Table S2.** Calculated electronic excitation energies, oscillator strengths and the related wave functions for **1a**, **1b**, **2a** and **2b** in kind of solvents calculated with the polarisable continuum model (PCM) by using the B3LYP functional with 6-31G(d) basis sets

| Solvents          |                | State <sup>[a]</sup> | E [eV] | Exp $\lambda$ [nm] | Cal $\lambda$ [nm] | $f^{[b]}$                    | Orbitals (coefficient) <sup>[c]</sup> |
|-------------------|----------------|----------------------|--------|--------------------|--------------------|------------------------------|---------------------------------------|
| Hexane            | <b>1a</b>      | S <sub>1</sub>       | 3.62   | 359                | 343                | 0.5747                       | H > L (91%)                           |
|                   |                | S <sub>2</sub>       | 3.05   | 396                | 406                | 0.0378                       | H-1 > L (87%)                         |
|                   | <b>1b</b>      | S <sub>4</sub>       | 3.28   |                    | 379                | 0.1357                       | H-3 > L (89%)                         |
|                   |                | S <sub>1</sub>       | 2.94   | 368                | 422                | 0.0992                       | H > L (98%)                           |
|                   | <b>2a</b>      | S <sub>2</sub>       | 3.40   |                    | 365                | 0.6416                       | H-1 > L (95%)                         |
|                   |                | S <sub>3</sub>       | 3.14   | 368                | 396                | 0.2071                       | H-2 > L (57%), H-1 > L (28%)          |
| <b>2b</b>         | S <sub>5</sub> | 3.26                 |        | 381                | 0.3608             | H-4 > L (92%)                |                                       |
|                   | <hr/>          |                      |        |                    |                    |                              |                                       |
| Toluene           | <b>1a</b>      | S <sub>1</sub>       | 3.60   | 363                | 345                | 0.6151                       | H > L (92%)                           |
|                   |                | S <sub>1</sub>       | 3.02   | 397                | 410                | 0.0366                       | H > L (92%)                           |
|                   | <b>1b</b>      | S <sub>4</sub>       | 3.30   |                    | 376                | 0.1427                       | H-3 > L (90%)                         |
|                   |                | S <sub>1</sub>       | 2.92   | 368                | 424                | 0.1047                       | H > L (98%)                           |
|                   | <b>2a</b>      | S <sub>2</sub>       | 3.38   |                    | 367                | 0.6835                       | H-1 > L (96%)                         |
|                   |                | S <sub>2</sub>       | 3.04   | 377                | 408                | 0.0316                       | H-1 > L (54%), H-2 > L (39%)          |
| <b>2b</b>         | S <sub>3</sub> | 3.14                 |        | 394                | 0.2709             | H-2 > L (53%), H-1 > L (34%) |                                       |
|                   | <hr/>          |                      |        |                    |                    |                              |                                       |
| DCM               | <b>1a</b>      | S <sub>1</sub>       | 3.60   | 361                | 345                | 0.6376                       | H > L (94%)                           |
|                   |                | S <sub>1</sub>       | 3.11   | 393                | 399                | 0.0881                       | H > L (93%)                           |
|                   | <b>1b</b>      | S <sub>3</sub>       | 3.37   |                    | 367                | 0.1256                       | H-3 > L (56%), H-2 > L (38%)          |
|                   |                | S <sub>1</sub>       | 2.89   | 368                | 429                | 0.0981                       | H > L (98%)                           |
|                   | <b>2a</b>      | S <sub>2</sub>       | 3.36   |                    | 370                | 0.6669                       | H-1 > L (97%)                         |
|                   |                | S <sub>2</sub>       | 3.12   | 376                | 397                | 0.1362                       | H-1 > L (54%), H-2 > L (39%)          |
| <b>2b</b>         | S <sub>3</sub> | 3.18                 |        | 389                | 0.2909             | H-2 > L (55%), H-1 > L (35%) |                                       |
|                   | S <sub>4</sub> | 3.32                 |        | 373                | 0.2306             | H-3 > L (94%)                |                                       |
| <hr/>             |                |                      |        |                    |                    |                              |                                       |
| THF               | <b>1a</b>      | S <sub>1</sub>       | 3.60   | 361                | 344                | 0.6296                       | H > L (93%)                           |
|                   |                | S <sub>1</sub>       | 3.10   | 395                | 392                | 0.0806                       | H > L (92%)                           |
|                   | <b>1b</b>      | S <sub>4</sub>       | 3.37   |                    | 368                | 0.1299                       | H-3 > L (50%), H-2 > L (44%)          |
|                   |                | S <sub>1</sub>       | 2.89   | 368                | 429                | 0.0973                       | H > L (98%)                           |
|                   | <b>2a</b>      | S <sub>2</sub>       | 3.36   |                    | 369                | 0.6601                       | H-1 > L (97%)                         |
|                   |                | S <sub>2</sub>       | 3.12   | 371                | 398                | 0.1121                       | H-1 > L (51%), H-2 > L (43%)          |
| <b>2b</b>         | S <sub>3</sub> | 3.18                 |        | 390                | 0.2980             | H-2 > L (51%), H-1 > L (38%) |                                       |
|                   | S <sub>4</sub> | 3.32                 |        | 374                | 0.2381             | H-3 > L (92%)                |                                       |
| <hr/>             |                |                      |        |                    |                    |                              |                                       |
| MeCN              | <b>1a</b>      | S <sub>1</sub>       | 3.61   | 360                | 344                | 0.6272                       | H > L (94%)                           |
|                   |                | S <sub>1</sub>       | 3.14   | 388                | 396                | 0.1016                       | H > L (92%)                           |
|                   | <b>1b</b>      | S <sub>3</sub>       | 3.40   |                    | 364                | 0.1204                       | H-3 > L (20%), H-2 > L (74%)          |
|                   |                | S <sub>1</sub>       | 2.88   | 366                | 430                | 0.0926                       | H > L (98%)                           |
|                   | <b>2a</b>      | S <sub>2</sub>       | 3.35   |                    | 370                | 0.6473                       | H-1 > L (97%)                         |
|                   |                | S <sub>2</sub>       | 3.15   | 370                | 394                | 0.2125                       | H-1 > L (62%), H-2 > L (30%)          |
| <b>2b</b>         | S <sub>3</sub> | 3.21                 |        | 387                | 0.2343             | H-2 > L (64%), H-1 > L (26%) |                                       |
|                   | S <sub>4</sub> | 3.35                 |        | 370                | 0.2092             | H-3 > L (95%)                |                                       |
| <hr/>             |                |                      |        |                    |                    |                              |                                       |
| CHCl <sub>3</sub> | <b>2a</b>      | S <sub>1</sub>       | 2.90   | 368                | 428                | 0.1003                       | H > L (98%)                           |
|                   |                | S <sub>2</sub>       | 3.36   |                    | 369                | 0.6705                       | H-1 > L (97%)                         |
| <hr/>             |                |                      |        |                    |                    |                              |                                       |
| DMF               | <b>2a</b>      | S <sub>1</sub>       | 2.88   | 369                | 430                | 0.0962                       | H > L (98%)                           |
|                   |                | S <sub>2</sub>       | 3.35   |                    | 371                | 0.6710                       | H-1 > L (97%)                         |
| <hr/>             |                |                      |        |                    |                    |                              |                                       |
| EtOH              | <b>2a</b>      | S <sub>1</sub>       | 2.88   | 367                | 430                | 0.0937                       | H > L (98%)                           |
|                   |                | S <sub>2</sub>       | 3.35   |                    | 370                | 0.6517                       | H-1 > L (97%)                         |
| <hr/>             |                |                      |        |                    |                    |                              |                                       |
| MeOH              | <b>2a</b>      | S <sub>1</sub>       | 2.89   | 366                | 430                | 0.0918                       | H > L (98%)                           |
|                   |                | S <sub>2</sub>       | 3.36   |                    | 370                | 0.6418                       | H-1 > L (97%)                         |

[a] Excited state. [b] Oscillator strength (<0.035 are not included). [c] MOs involved in the transitions with H and L denoting

the HOMO and LUMO, respectively.

**Table S3.** Calculated electronic excitation energies, oscillator strengths and the related wave functions for **1a**, **1b**, **2a** and **2b** in CH<sub>2</sub>Cl<sub>2</sub> calculated with the polarisable continuum model (PCM) by using the B3LYP and CAM-B3LYP functionals with 6-31G(d) basis sets

| Cal<br>Functionals | State <sup>[a]</sup> | E<br>[eV]      | Exp<br>$\lambda$ [nm] | Cal<br>$\lambda$ [nm] | $f$ <sup>[b]</sup> | Orbitals (coefficient) <sup>[c]</sup> |                              |
|--------------------|----------------------|----------------|-----------------------|-----------------------|--------------------|---------------------------------------|------------------------------|
| CAM-<br>B3LYP      | <b>1a</b>            | S <sub>1</sub> | 3.92                  | 361                   | 316                | 0.6959                                | H > L (89%)                  |
|                    |                      | <b>1b</b>      | S <sub>1</sub>        | 3.59                  | 393                | 345                                   | 0.3099                       |
|                    | S <sub>3</sub>       |                | 4.20                  |                       | 296                | 0.2466                                | H-5 > L (53%) H-2 > L (29%)  |
|                    | <b>2a</b>            | S <sub>1</sub> | 3.72                  | 368                   | 333                | 0.3059                                | H > L (80%)                  |
|                    |                      | S <sub>2</sub> | 3.84                  |                       | 323                | 0.8548                                | H-1 > L (70%)                |
|                    | <b>2b</b>            | S <sub>1</sub> | 3.52                  | 376                   | 352                | 0.2442                                | H-1 > L (65%)                |
|                    |                      | S <sub>2</sub> | 3.76                  |                       | 330                | 0.5870                                | H > L (65%)                  |
|                    | B3LYP                | <b>1a</b>      | S <sub>1</sub>        | 3.60                  | 361                | 345                                   | 0.6376                       |
| <b>1b</b>          |                      |                | S <sub>1</sub>        | 3.11                  | 393                | 399                                   | 0.0881                       |
|                    |                      | S <sub>3</sub> | 3.37                  |                       | 367                | 0.1256                                | H-3 > L (56%), H-2 > L (38%) |
| <b>2a</b>          |                      | S <sub>1</sub> | 2.89                  | 368                   | 429                | 0.0981                                | H > L (98%)                  |
|                    |                      | S <sub>2</sub> | 3.36                  |                       | 370                | 0.6669                                | H-1 > L (97%)                |
| <b>2b</b>          |                      | S <sub>2</sub> | 3.12                  | 376                   | 397                | 0.1362                                | H-1 > L (54%), H-2 > L (39%) |
|                    |                      | S <sub>3</sub> | 3.18                  |                       | 389                | 0.2909                                | H-2 > L (55%), H-1 > L (35%) |
|                    |                      | S <sub>4</sub> | 3.32                  |                       | 373                | 0.2306                                | H-3 > L (94%)                |

[a] Excited state. [b] Oscillator strength (<0.035 are not included). [c] MOs involved in the transitions with H and L denoting the HOMO and LUMO, respectively.

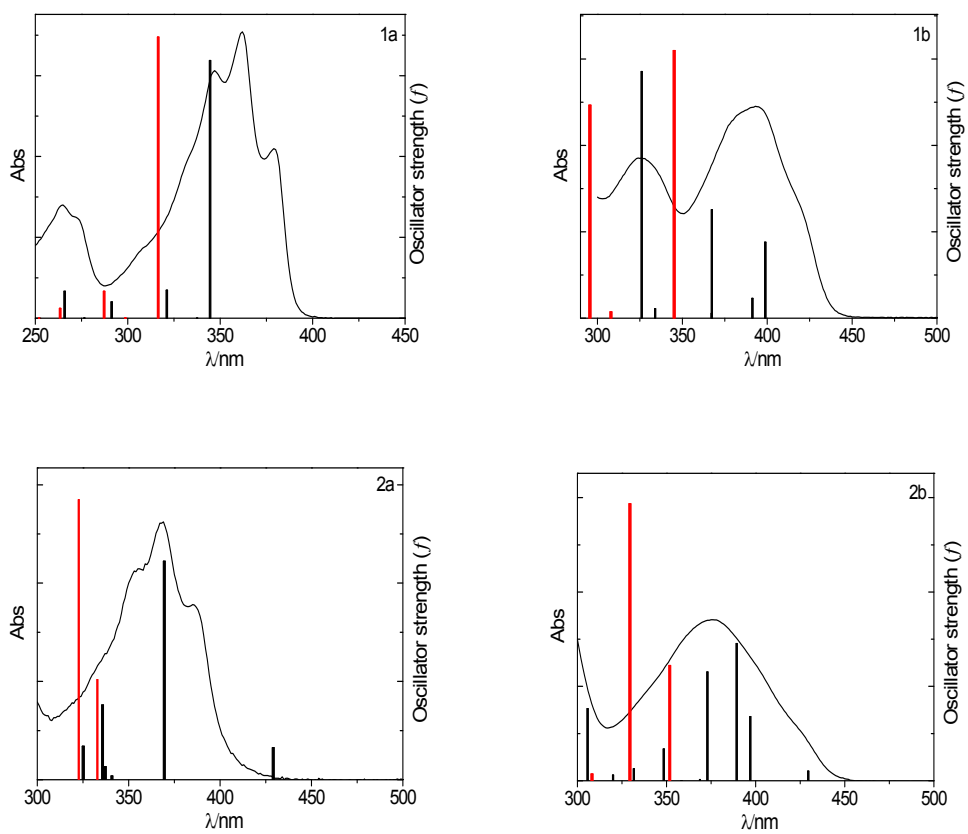

**Fig. S5.** Observed spectra in  $\text{CH}_2\text{Cl}_2$  (black line) and calculated TD-DFT oscillator strength in  $\text{CH}_2\text{Cl}_2$  based on geometry optimizations using the B3LYP functional (black bar) and CAM-B3LYP functional (red bar) with 6-31G(d) basis sets.

# II <sup>1</sup>H NMR

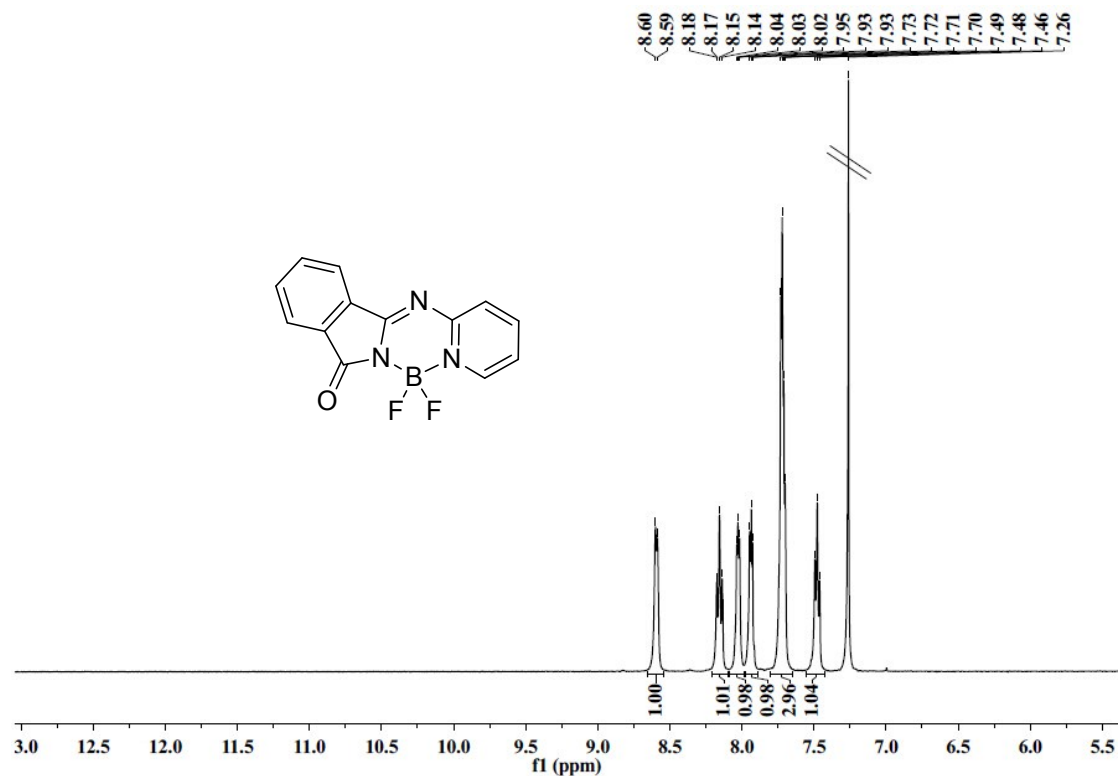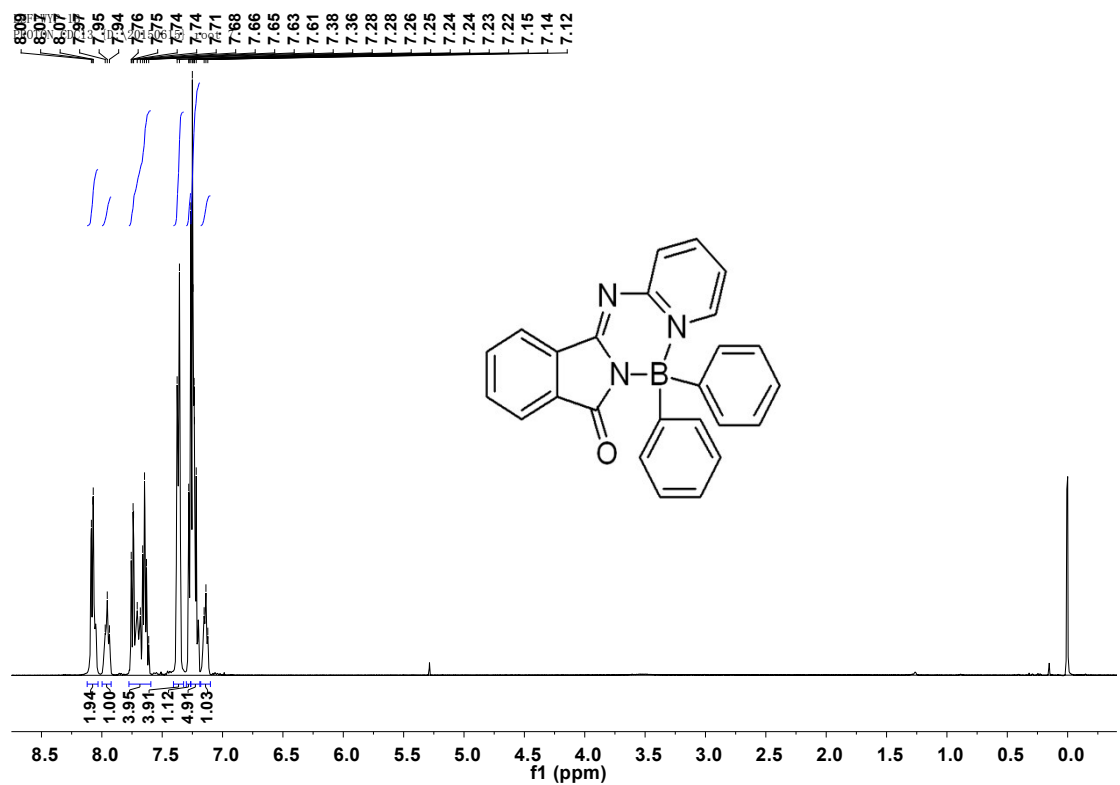



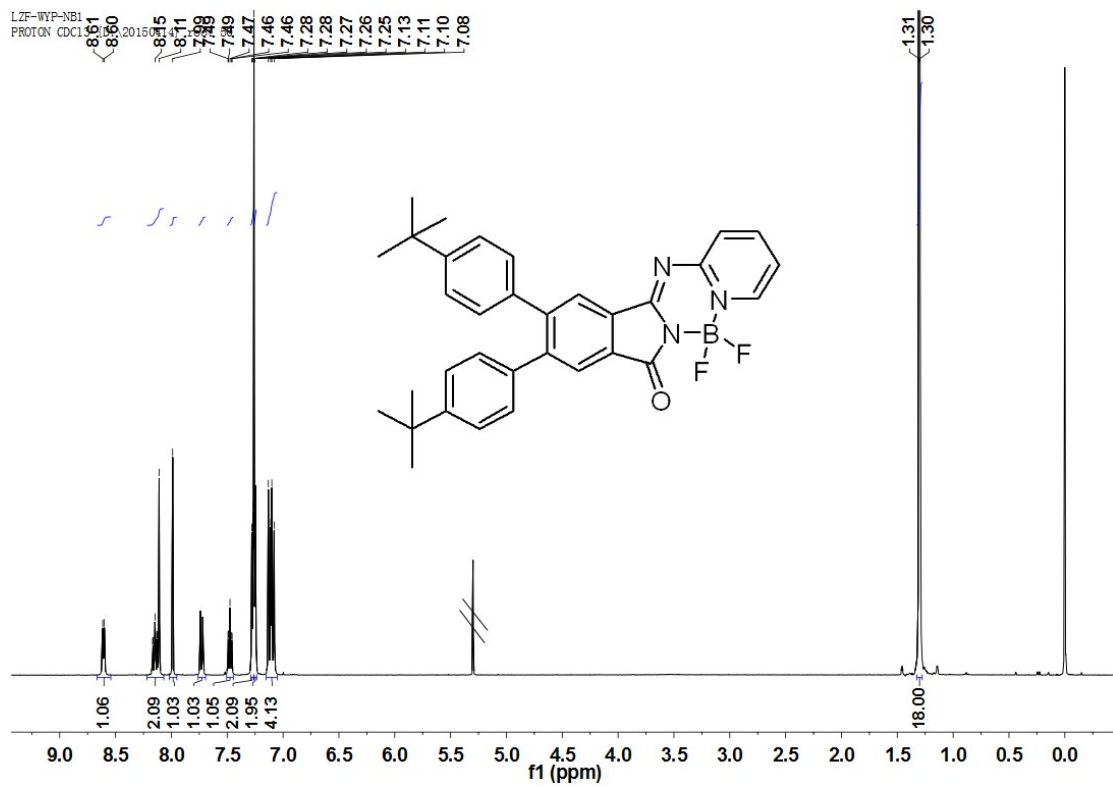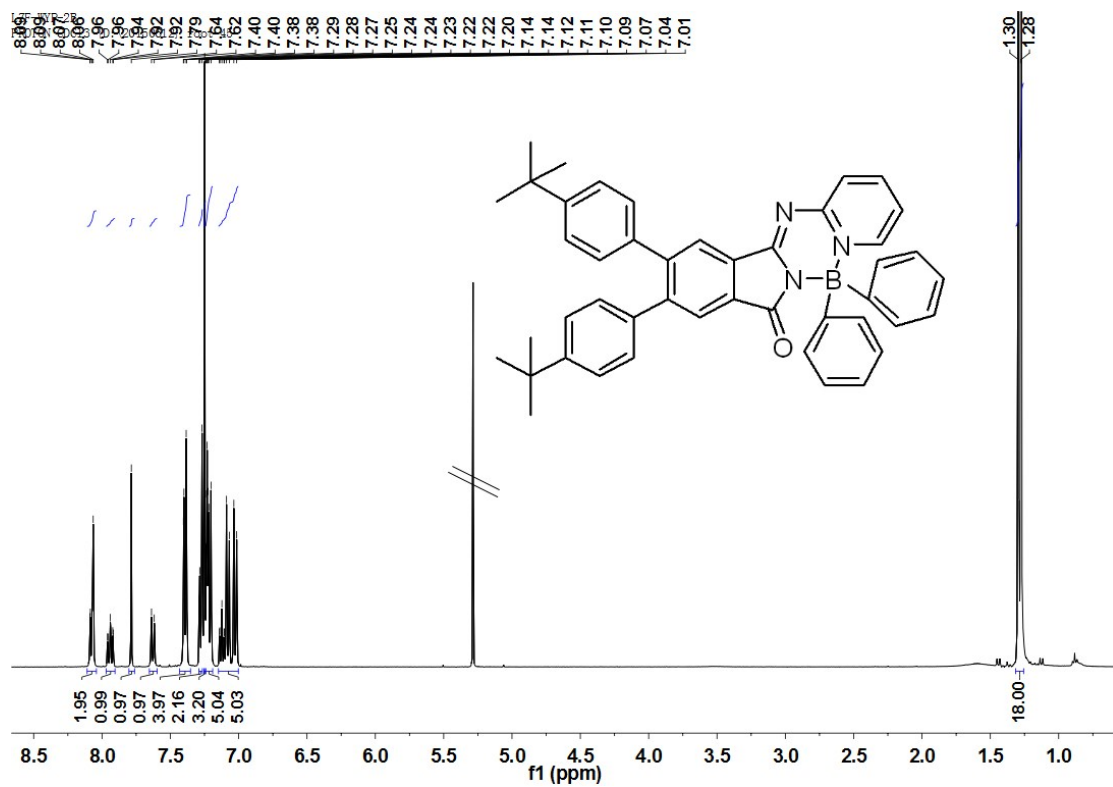

Supplement: c5tc03084f1.pdf [file c5tc03084f1.pdf]
